1 **Association of age-related spontaneous internal jugular vein reflux**  
2 **with cognitive impairment and incident dementia**

3

4 **Authors:**

5 Utako Adachi, MD, PhD<sup>1</sup>; Sono Toi, MD, PhD<sup>1</sup>; Megumi Hosoya, MD, PhD<sup>1</sup>;  
6 Takao Hoshino, MD, PhD<sup>1</sup>; Misa Seki, MD, PhD<sup>1</sup>; Hiroshi Yoshizawa, MD,  
7 PhD<sup>1</sup>; Yukiko Tsutsumi, MD, PhD<sup>1</sup>; Kenji Maruyama, MD, PhD<sup>1</sup>; Kazuo  
8 Kitagawa MD, PhD<sup>1</sup>

9

10 **Affiliation:**

11 <sup>1</sup>Department of Neurology, Tokyo Women's Medical University Hospital,  
12 Tokyo, Japan

13

14 **Correspondence to:**

15 Kazuo Kitagawa, MD

16 Department of Neurology, Tokyo Women's Medical University Hospital

17 8-1, Kawada-cho, Shinjuku-ku, 162-8666 Tokyo, Japan.

18 E-mail: [kitagawa.kazuo@twmu.ac.jp](mailto:kitagawa.kazuo@twmu.ac.jp)

19 Tel: +81 3 3353 8111

20

21 **Cover title:** Jugular vein reflux and cognitive decline

22

23 **Total number of tables and figures:** Tables 3; Figures 3; Supplemental

24 Tables 4; Supplementary Figure 1

25

26 **Word count:** 4941

27

28

29 **Abstract**

30 **Background and purpose:** The vascular aspect of cognitive impairment  
31 focuses on cerebral small-vessel disease and arterial circulation. However,  
32 it remains unclear whether changes in the venous circulation contribute to  
33 cognitive decline. This study aimed to clarify whether the spontaneous  
34 jugular vein reflux (JVR) is associated with cognitive impairment and  
35 incident dementia.

36 **Methods:** The Tokyo Women's Medical University Cerebrovascular  
37 Disease registry is a prospective observational registry in which patients  
38 with any evidence of cerebral vessel disease on magnetic resonance  
39 imaging (MRI) were consecutively enrolled between October 2015 to July  
40 2019. We employed carotid duplex sonography to measure the internal  
41 jugular vein (IJV). The subjects were classified into two groups based on  
42 the degree of JVR on either side: none, mild (JVR(-) group) and moderate,  
43 severe (JVR (+) group) JVR. They underwent both the Mini-mental State  
44 Examination (MMSE) and Montreal Cognitive Assessment-Japanese  
45 (MoCA-J) global tests. Their cognitive status was prospectively assessed  
46 until March 2022.

47 **Results:** Among 906 patients with an MMSE score  $\geq$  24 enrolled in the  
48 registry, 302 underwent duplex sonography of the IJV. Among them, 91  
49 had spontaneous JVR on either side. Both MMSE and MoCA-J were  
50 significantly lower in patients with JVR (+) group than in the JVR (-)  
51 group. After the adjustment for age, sex, years of education, risk factors,  
52 and MRI findings, including small-vessel disease and medial temporal  
53 atrophy, intergroup differences in MoCA-J remained significant. Among  
54 the cognitive subdomains, median executive function and memory scores  
55 were significantly lower in the JVR (+) group than in the JVR (-) group.  
56 During the median 5.2-year follow-up, 11 patients with incident dementia  
57 (Alzheimer disease: 10, vascular dementia: 1) were diagnosed. Patients  
58 with severe JVR were significantly more likely to be diagnosed with  
59 dementia (log-rank test,  $P= 0.031$ ).

60 **Conclusions:** Spontaneous IJV reflux especially severe JVR, was  
61 associated with global cognitive function, and potentially with incident  
62 dementia.

63

64 **Clinical Trial Registration:**

65 [URL:https://www.umin.ac.jp](https://www.umin.ac.jp). Unique identifier: UMIN000026671.

66

67

68 **Nonstandard Abbreviations and Acronyms**

69 IVJ = internal jugular vein; JVR = jugular vein reflux; HDL-C =

70 high-density lipoprotein cholesterol; LDL-C = low-density lipoprotein

71 cholesterol; MRI = magnetic resonance imaging; MMSE = mini-mental

72 State Examination; MoCA-J = Montreal Cognitive Assessment-Japanese;

73 STROBE = Strengthening the Reporting of Observational Studies in

74 Epidemiology; TIA = transient ischemic attack; TWMU = Tokyo Women's

75 Medical University; CDR = clinical dementia rating

76

77 **Introduction**

78

79 The vascular aspect on cognitive impairment and dementia has attracted  
80 considerable attention because of the possibility of preventing dementia<sup>1</sup>.

81 Aging influences vascular function in the arterial and venous systems.

82 Although previous studies mostly focused on cerebral small-vessel

83 disease (SVD) and arterial circulation in cognitive impairment, few

84 examined the involvement of age-related venous dysfunction in cognitive

85 function. The cerebral venous system plays an important role in normal

86 brain function<sup>2,3</sup>, and an increase in cerebral vein pressure due to arterial

87 venous fistula<sup>4</sup> or cerebral venous thrombosis<sup>5</sup> contributes to white

88 matter lesions, cognitive decline and dementia. The internal jugular veins

89 (IJVs) are the main drainage route for cerebral venous outflow<sup>6,7</sup>, and its

90 hemodynamics can be examined using a non-invasive ultrasound

91 method<sup>8</sup>. The flow of the IJVs usually moves from the brain to the heart

92 and antegrade; however, the frequency of the retrograde flow pattern,

93 jugular vein reflux (JVR), increases with aging<sup>8</sup>. Although findings in

94 multiple sclerosis are controversial<sup>9</sup>, the association of JVR with

95 normal-pressure hydrocephalus<sup>10</sup> or severe white matter lesions<sup>11</sup> was  
96 previously shown, and the retrograde transmission of venous pressure  
97 waves due to JVR was suggested involved in blood brain barrier  
98 disruption<sup>2</sup>. Cerebral venous outflow pathways depend on posture; in the  
99 spine position, the IJVs are the primary venous drains; however, in the  
100 sitting and standing positions, jugular veins collapse due to high outflow  
101 resistance, and the vertebral veins become the major exit pathways<sup>12</sup>.  
102 Although JVR has been examined mostly under the Valsalva maneuver in  
103 the supine position, spontaneous JVR under normal breathing, as seen  
104 during sleep, has a more sustained retrograde-transmitted venous  
105 pressure into the cerebral venous system, and may have a greater impact  
106 on cerebral circulation and amyloid clearance in daily life. Here, we aimed  
107 to clarify whether JVR during normal breathing in the supine position is  
108 related to cognitive function and incident dementia in non-demented  
109 individuals with vascular risk factors.

110

## 111 **Method**

### 112 ***Study design and patients***

113 Data were derived from a prospective study, the Tokyo Women's Medical  
114 University Cerebral Vessel Disease (TWMU CVD) Registry, from October  
115 2015 to July 2019 (Registration-URL:  
116 <https://www.umin.ac.jp/ctr/index.htm>; UMIN000026671). Written  
117 informed consent was obtained from all participants. The study was  
118 approved by the Institutional Review Board of Tokyo Women's Medical  
119 University. The research protocol and inclusion criteria of the TWMU CVD  
120 registry were previously described in detail<sup>13</sup>. Briefly, we consecutively  
121 included patients aged 40 years and older, who presented with cerebral  
122 vessel disease on magnetic resonance imaging (MRI) and with one or  
123 more cerebrovascular risk factors, such as arterial hypertension, diabetes  
124 mellitus, dyslipidemia, coronary artery disease, atrial fibrillation, or  
125 smoking. The exclusion criteria for the registry were any kind of aphasia,  
126 evidence of dementia (Clinical Dementia Rating<sup>14</sup>  $\geq 1$ ), and dependence  
127 on activities of daily living and walking. We excluded patients who  
128 experienced vascular events within 1 month of enrollment. The protocol  
129 conformed to the ethical guidelines of the 1975 Declaration of Helsinki in  
130 line with the Ethical Guidelines for Epidemiological Research by the



131 Japanese government and the Strengthening the Reporting of  
132 Observational Studies in Epidemiology (STROBE) guidelines.

133

#### 134 ***Cognitive examination***

135 Patients underwent both the Mini-Mental State Examination (MMSE)<sup>15</sup>  
136 and the Japanese version of the Montreal Cognitive Assessment  
137 (MoCA-J)<sup>16</sup> within 3 months of the MRI examination. Among items in  
138 MMSE and MoCA-J, we extracted executive function (0-4), memory (0-8),  
139 orientation (0-10), language (0-13), visuospatial function (0-5) and  
140 attention and working memory (0-11) (**Supplementary Table I**).

141

#### 142 ***MRI Assessment***

143 Each subject underwent a brain MRI scan within 1 year of entry to the  
144 registry. The MRI assessment included white matter hyperintensities  
145 (WMH) consisting of periventricular hyperintensities (PVH) and deep  
146 white matter hyperintensities (DWMH), lacunar infarctions (LI), cerebral  
147 microbleeds (CMBs), and medial temporal atrophy (MTA). The degree of  
148 WMH severity was visually rated using axial fluid-attenuated inversion

149 recovery (FLAIR) images. Based on the Fazekas scale (0 = none; 1 =  
150 mild; 2 = moderate; 3 = severe)<sup>17</sup>, PVH and DWMH were scored as 0-3;  
151 the total WMH score was 0-6 with the sum of PVH and DWMH. The  
152 degrees of WMH in the frontal, temporal, parietal, and occipital lobes  
153 were visually rated using the Scheltens Scale<sup>18</sup> with slight modifications:  
154 scores of 0-6 (0 = absent, 1 = <3 mm in  $\leq 5$ , 2 = <3 mm in  $\geq 6$ , 3 = 4-  
155 10 mm in  $\leq 5$ , 4 = 4-10 mm in  $\geq 6$ , 5 =  $\geq 11$  mm in  $\geq 1$ , and 6 = confluent)  
156 were assigned for deep WMH (frontal, temporal, parietal, and occipital).  
157 Lesions in the basal ganglia, internal capsule, centrum semiovale, or  
158 brainstem, with hypointensity on T1-weighted imaging (T1WI),  
159 hyperintensity on T2-weighted imaging (T2WI), and a hyperintense rim  
160 around the cavity on FLAIR were defined as LI<sup>19</sup>; the sizes of which were  
161 from 3-15 mm. CMBs were defined as punctate or small patchy lesions  
162 <10 mm in diameter with clearly low intensity on T2\*WI<sup>19</sup>. MTA was  
163 visually evaluated as described by Kim et al.<sup>20</sup> All MRI feature grades were  
164 rated by two trained board-certified neurologists (M.H. and M.S.), who  
165 were blinded to the clinical details. The interrater  $\kappa$  for each CSVD feature  
166 or MTA score was between 0.80-0.85. A third rater (K.K.) was consulted

167 in cases of disagreement.

168

169 ***Carotid Duplex sonography***

170 Color-coded duplex sonography was performed using a 7.5-MHz linear  
171 transducer (Hitachi Aloka Prosound  $\alpha$ 7; Hitachi-Aloka Medical, Ltd. Tokyo,  
172 Japan). On examination, the subjects were placed in a head-straight, flat  
173 supine position. After routine examination of both carotid arteries for the  
174 measurement of intima-media complex thickness, % stenosis (if present),  
175 and peak systolic blood flow of the common, internal carotid, and  
176 vertebral arteries, bilateral IJVs were examined 5 cm above the junction  
177 of the IJV and brachiocephalic vein, as described previously with slight  
178 modification<sup>8</sup>). The cross-sectional lumen was recorded, and the probe  
179 was turned by 90<sup>0</sup> at the same site, the IJV was insonated longitudinally,  
180 and the color box adjusted to include the entire IJV lumen. The Doppler  
181 spectrum was then measured for at least three cardiac cycles under  
182 normal expiration. We divided the flow pattern into four groups (**Figure**  
183 **1**); anterograde flow during the entire cardiac cycle without retrograde  
184 flow (Grade A; **Figure 1A**), anterograde flow during the entire cardiac

185 cycle with intermittent retrograde flow (Grade B; **Figure 1B**), a  
186 to-and-flow pattern, in which anterograde and retrograde flow appeared  
187 alternatively during the cardiac cycle (Grade C; **Figure 1C**), and  
188 retrograde flow during the entire cardiac cycle without anterograde flow  
189 (Grade D; **Figure 1D**). The former two, mainly anterograde flow, were  
190 designated JVR (-), while the latter two were designated JVR (+). For  
191 evaluation of IJV in each patient, the higher JVR grade among both sides  
192 was used.

193 An interrater reproducibility test of IJV in 40 vessels of 20 patients (two  
194 measurements performed within 30 min) by two blinded examiner (U.A.  
195 and S.T.) showed an excellent reproducibility; concordance rates among 4  
196 grades and between JVR (-) and (+) groups, were 100% (40/40), and  
197 97.5% (39/40), respectively. An intrarater reproducibility test (U.A.) of  
198 IJV in 128 vessels of 64 patients (two measurements performed blindly at  
199 intervals between 6 months and 1 year) also showed a fair reproducibility  
200 (concordance rate among four grades and between JVR (-) and (+)  
201 groups were 81.3% (104/128) and 97.7%, (125/128), respectively.

202

203 ***Diagnosis of dementia***

204 Cognitive status was assessed prospectively by a neurologist using the  
205 MMSE and CDR<sup>14</sup>. Patients visited outpatient clinic settings to control risk  
206 factors every 3 months for prevention of stroke. Changes in patients'  
207 general medical condition were obtained yearly through medical records  
208 and interview. Furthermore, several aspects of everyday cognitively  
209 driven functioning to rate patients on the CDR were assessed at every  
210 clinical visit. Thus, annual evaluations were performed by trained  
211 neurologists and included a medical history, CDR score determination,  
212 and neurological examination. Patients were cognitively screened with  
213 the MMSE at follow-up visits. The final follow-up data were collected on  
214 March 2022. During the follow-up periods, patients with suspected  
215 cognitive decline were periodically examined by a neurologist. Clinically  
216 significant cognitive impairment was defined as MMSE score < 24 or a  
217 decline  $\geq 4$  points. In addition, patients were considered to have probable  
218 dementia if they had 2 consecutive semiannual CDR scores  $\geq 1$  and did  
219 not revert back to normal cognition. To avoid missing incident dementia  
220 cases, we also continuously monitored the medical records of all

221 participants at our clinic or other clinic to obtain information on diagnosed  
222 dementia and stroke or death. Furthermore, for those patients who could  
223 not attend the clinical visit, a phone interview collecting clinical data was  
224 performed with the patient and the carer, whenever possible. Finally, an  
225 independent committee of neurologists reviewed all potential cases of  
226 dementia with all available information to reach a consensus on the  
227 diagnosis, according to the DSM-5<sup>21</sup>. Dementia subtypes were diagnosed  
228 according to standardized criteria<sup>22,23</sup>. Time to dementia was defined as  
229 the time between the baseline visit and the date of dementia diagnosis. In  
230 addition, patients were followed until death or refusal of further  
231 participation. Those who did not progress to dementia were censored at  
232 their last visit.

233

### 234 ***Statistical analysis***

235 All analyses were performed using JMP 14 Pro. For baseline  
236 characteristics, continuous variables are expressed as mean and standard  
237 deviation (SD), while categorical variables are expressed as frequency  
238 and percentage. Ordinal and non-normally distributed variables are

239 shown as median and interquartile range. Relationships between the  
240 MMSE, MoCA-J, or each cognitive domain and continuous variables were  
241 examined using Person's correlation analysis. For categorical variables,  
242 differences in MMSE and MoCA-J scores were examined using an unpaired  
243 t-test. Furthermore, a linear mixed model was used to examine the  
244 associations between JVR and MMSE or MoCA-J scores by controlling for  
245 age, sex, education, risk factors, and MRI findings. The Kaplan-Meier  
246 method with log-rank tests was used to compare dementia-free survival  
247 for JVR.

248

## 249 **Results**

250 A total of 302 patients ( $71.1 \pm 10.5$  years; 177 men, 125 women)  
251 underwent carotid ultrasonography with IJV evaluations  
252 (**Supplementary Figure I**). Their demographic and clinical  
253 characteristics are presented in **Table 1**.

254 Among the 302 patients, 122 (40.4 %) showed Grade A in IJV, 89  
255 (29.5%) Grade B, 76 (25.2%) Grade C, 15 (5.0%) Grade D (Figure 1A-D).  
256 In total, 91 (30.1%) showed JVR (Figure 1C, 1D) on either side. The

257 jugular flow patterns of the 604 vessels in 302 patients are shown in  
258 **Supplementary Table II**. JVR was found more frequently on the left side  
259 (20.9%, 63/302) than on the right side (13.2%, 42/302). Fourteen  
260 patients (4.6%) showed bilateral JVR, while 77 (25.5%) showed a  
261 unilateral JVR. The incidence of JVR increased with age (**Figure 2A**).  
262 Patients with JVR were older ( $P<0.001$ ), and more likely had a history of  
263 previous ischemic heart disease ( $P=0.034$ ) than those without JVR.  
264 (**Table 1**). In terms of MRI findings, the Fazekas WMH scores were similar  
265 between the two groups, but the occipital WMH grades were more severe  
266 in patients with versus without JVR ( $P=0.005$ ). (**Table 1**).  
267 MMSE scores were  $28.5\pm 1.7$ ,  $28.2\pm 1.9$ ,  $27.9\pm 1.8$  and  $27.0\pm 2.0$  in Grade  
268 A, B, C and D, respectively (ANOVA,  $P=0.107$ ). MoCA-J scores were  
269  $25.2\pm 3.1$ ,  $24.3\pm 3.3$ ,  $23.1\pm 3.2$  and  $21.6\pm 2.5$  in Grade A, B, C and D,  
270 respectively (ANOVA,  $P<0.001$ ). Global cognitive function and each  
271 subdomain in JVR (-) and JVR (+) groups are shown in **Table 2**. The  
272 distribution patterns of MMSE and MoCA-J scores between the JVR (-) and  
273 JVR (+) groups are shown in **Figures 2B and 2C**. Mean MMSE and  
274 MoCA-J scores were significantly lower in the JVR (+) versus JVR (-)



275 group, while the mean executive function and memory scores were  
276 significantly lower in the JVR (+) versus JVR (-) group. The scores of the  
277 other subdomains were similar between groups.

278 The MMSE and MoCA-J scores with confounding factors are shown in  
279 **Supplementary Table III**. Age was significantly associated with both  
280 MMSE and MoCA-J scores; mean MMSE scores were higher in patients  
281 with high education, while mean MoCA-J scores were higher in women.  
282 Other vascular risk factors did not show a significant relationship with  
283 MMSE and MoCA-J scores among the 302 patients.

284 The association between JVR and MoCA-J score remained significant after  
285 the adjustment for confounding factors (**Table 3**). The association  
286 between JVR and MMSE was significant after the adjustment for age and  
287 sex; however, the association was no longer significant after the further  
288 adjustment for education and risk factors (**Table 3**).

289 From the initial cohort (N=302), 13 patients (4.3%) withdrew consent,  
290 five patients (1.7%) were lost, and four patients (1.3%) had died during  
291 follow-up. 81.1% (n=245) of the patients could be examined in a clinical  
292 visit at the end of follow-up. Among these 245 patients, 25 patients had a

293 decline in MMSE score of  $\geq 4$  points, or had an MMSE score  $< 24$  by the end  
294 of follow-up. These patients were subsequently examined for CDR score  
295 determination, and 9 were diagnosed with dementia. Also using data  
296 from telephone interview or medical records, we ascertained cognitive  
297 status in the remaining 35 patients (11.6% of initial sample), and 2  
298 patients were diagnosed with dementia. Thus, during the median  
299 5.2-year follow-up, all-cause dementia was diagnosed in 11 patients  
300 (Alzheimer disease: 10, vascular dementia: 1). The survival analyses for  
301 dementia-free rate curves created with respect to JVR are shown in  
302 Figure 3. Although no significant difference was seen between JVR (-) and  
303 JVR (+) groups (Figure 3A), patients with severe JVR were significantly  
304 more likely to be diagnosed with dementia compared with other groups  
305 (Figure 3B, log-rank test,  $P=0.006$ ).

306

307

## 308 **Discussion**

309 To the best of our knowledge, this is the first study to clarify the  
310 association between spontaneous JVR and cognitive function or incident

311 dementia in individuals without dementia. This study included more than  
312 300 patients; therefore we examined the association after adjusting for  
313 confounding factors with JVR and cognitive function.

314 Several neurological diseases and conditions are associated with cerebral  
315 venous insufficiency. Although the correlation between venous  
316 insufficiency and multiple sclerosis proposed by Zamboni et al.<sup>24</sup> was later  
317 denied<sup>25</sup>, age-related neurological conditions such as normal  
318 hydrocephalus<sup>10</sup>, transient global amnesia<sup>26</sup>, white matter lesions<sup>11</sup> and  
319 cognitive decline in mitral valve regurgitation<sup>27</sup> were demonstrated  
320 associated with JVR.

321 The incidence of JVR under spontaneous breathing, the Valsalva  
322 maneuver, and both in previous studies is summarized in  
323 **Supplementary Table IV**. Both age and cardiac dysfunction increase the  
324 incidence of JVR<sup>2</sup>. Our study also clearly showed that aging increased the  
325 incidence of JVR (Figure 1). Under spontaneous breathing, the incidence  
326 of JVR seemed higher on the left versus right side<sup>11,28,29</sup>, whereas under a  
327 Valsalva maneuver, it was similar or higher on the right side<sup>8,27,30</sup>. The  
328 narrow space between the sternum and the thoracic outlet arteries,

329 especially under normal breathing, might compress the left  
330 brachiocephalic vein, leading to JVR in the left internal vein<sup>27</sup>. Full  
331 inspiration under the Valsalva maneuver increases the distance between  
332 the aortic arch and sternum, thus extinguishing that tendency<sup>31</sup>. In  
333 contrast, the right IJV is closer to the heart than the left IJV, and more  
334 susceptible to retrograde pressure via the central vein under the Valsalva  
335 maneuver, which might explain the higher incidence of JVR in the right IJV  
336 in previous studies.

337 Several mechanisms would underlie the association between the JVR and  
338 cognitive function. First, an increase in cerebral venous pressure could  
339 decrease the absorption of cerebral spinal fluid through the arachnoid villi  
340 as seen in normal pressure hydrocephalus. Second, cerebral venous  
341 insufficiency in JVR would influence glymphatic circulation<sup>32</sup> and impair  
342 amyloid  $\beta$  clearance. Third, increased cerebral venous pressure may  
343 disrupt the blood-brain barrier, trigger microhemorrhage and decrease  
344 cerebral blood flow, resulting in cognitive decline<sup>2</sup>. Our results showed  
345 that JVR is related to occipital WMH (Table 1), in line with previous  
346 findings.<sup>11</sup>

347 This study had several limitations. First, our study suggested that severe  
348 JVR was associated with incident dementia, but the event number was  
349 small and did not allow us to adjust confounding factors such as age and  
350 MMSE scores, therefore, further studies will be required to clarify whether  
351 JVR predicts incident dementia. Second, the evaluation of white matter  
352 lesions and MTA was semi-quantitative. A quantitative evaluation is  
353 needed to precisely clarify the association between the JVR and MRI  
354 findings. Third, it remains unclear whether JVR intervention recovers  
355 cognitive function. And finally, we evaluated the JVR under normal  
356 breathing. Therefore, it remains unknown whether JVR during the  
357 Valsalva maneuver is associated with cognitive decline. However, in daily  
358 life, especially during sleep, we breathe normally, not in full inspiration, in  
359 the spine position. The incidence of JVR in the present study reflects the  
360 percentage of JVR during sleep in daily life, and would have a greater  
361 impact on the cerebral venous circulation than the Valsalva maneuver.

362 In conclusion, here we clarified the relation between JVR with MoCA-J  
363 scores independent of age and confounding factors, and suggested the  
364 association between severe JVR and incident dementia. Our findings

365 suggest that spontaneous JVR affects cognitive function.

366

367 **Acknowledgements**

368 None.

369

370 **Sources of Funding**

371 None.

372

373 **Disclosures**

374 Dr Kitagawa reports personal fees from Kyowa Kirin and Kowa, grants and  
375 personal fees from Daiichi Sankyo, outside the submitted work.

376

377 Other authors have nothing to disclose.

378

379 **Supplemental Materials**

380 Table I-IV Figure I

381 **Reference**

- 382 1. Gorelick PB, Scuteri A, Black SE, Decarli C, Greenberg SM, Iadecola C,  
383 Launer LJ, Laurent S, Lopez OL, Nyenhuis D, et al. Vascular  
384 contributions to cognitive impairment and dementia: a statement for  
385 healthcare professionals from the american heart  
386 association/american stroke association. *Stroke*. 2011;42:2672-713.  
387 doi: 10.1161/STR.0b013e3182299496.
- 388 2. Fulop GA, Tarantini S, Yabluchanskiy A, Molnar A, Prodan CI, Kiss T,  
389 Csipo T, Lipecz A, Balasubramanian P, Farkas E, et al. Role of  
390 age-related alterations of the cerebral venous circulation in the  
391 pathogenesis of vascular cognitive impairment. *Am J Physiol Heart*  
392 *Circ Physiol*. 2019;316:H1124-H1140. doi:  
393 10.1152/ajpheart.00776.2018.
- 394 3. Molnár AÁ, Nádasy GL, Dörnyei G, Patai BB, Delfavero J, Fülöp GÁ,  
395 Kirkpatrick AC, Ungvári Z, Merkely B. The aging venous system: from  
396 varicosities to vascular cognitive impairment. *Geroscience*.  
397 2021;43:2761-2784. doi: 10.1007/s11357-021-00475-2.
- 398 4. Waragai M, Takeuchi H, Fukushima T, Haisa T, Yonemitsu T. MRI and

399 SPECT studies of dural arteriovenous fistulas presenting as pure  
400 progressive dementia with leukoencephalopathy: a cause of treatable  
401 dementia. *Eur J Neurol.* 2006;13:754-9. doi:  
402 10.1111/j.1468-1331.2006.01318.x.

403 5. Bugnicourt JM, Guegan-Massardier E, Roussel M, Martinaud O,  
404 Canaple S, Triquenot-Bagan A, Wallon D, Lamy C, Leclercq C,  
405 Hannequin D, Godefroy O. Cognitive impairment after cerebral venous  
406 thrombosis: a two-center study. *J Neurol.* 2013;260:1324-31. doi:  
407 10.1007/s00415-012-6799-5

408 6. Griffiths PD: Vascular supply of the brain. In: Gray's Anatomy, 14ed  
409 ed., ed. By Crossman AR, Churchill Livingstone, Philadelphia, 2008, pp.  
410 247-256.

411 7. Schaller B. Physiology of cerebral venous blood flow: from  
412 experimental data in animals to normal function in humans. *Brain Res*  
413 *Brain Res Rev.* 2004;46:243-60. doi:  
414 10.1016/j.brainresrev.2004.04.005

415 8. Chung CP, Lin YJ, Chao AC, Lin SJ, Chen YY, Wang YJ, Hu HH. Jugular  
416 venous hemodynamic changes with aging. *Ultrasound Med Biol.*



- 417 2010;36:1776-82. doi: 10.1016/j.ultrasmedbio.2010.07.006
- 418 9. Paul F, Wattjes MP. Chronic cerebrospinal venous insufficiency in  
419 multiple sclerosis: the final curtain. *Lancet*. 2014;383:106-8. doi:  
420 10.1016/S0140-6736(13)61912-1.
- 421 10. Kuriyama N, Tokuda T, Miyamoto J, Takayasu N, Kondo M, Nakagawa  
422 M. Retrograde jugular flow associated with idiopathic normal pressure  
423 hydrocephalus. *Ann Neurol*. 2008;64:217-21. doi:  
424 10.1002/ana.21410.
- 425 11. Chung CP, Wang PN, Wu YH, Tsao YC, Sheng WY, Lin KN, Lin SJ, Hu  
426 HH. More severe white matter changes in the elderly with jugular  
427 venous reflux. *Ann Neurol*. 2011r;69:553-9. doi:  
428 10.1002/ana.22276.
- 429 12. Gisolf J, van Lieshout JJ, van Heusden K, Pott F, Stok WJ, Karemaker  
430 JM. Human cerebral venous outflow pathway depends on posture and  
431 central venous pressure. *J Physiol*. 2004;560(Pt 1):317-27. doi:  
432 10.1113/jphysiol.2004.070409.
- 433 13. Kubota M, Iijima M, Shirai Y, Toi S, Kitagawa K. Association Between  
434 Cerebral Small Vessel Disease and Central Motor Conduction Time in

- 435 Patients with Vascular Risk. *J Stroke Cerebrovasc Dis.*  
436 2019;28:2343-2350. doi:  
437 10.1016/j.jstrokecerebrovasdis.2019.05.030.
- 438 14. Hughes CP, Berg L, Danziger WL, Coben LA, Martin RL. A new clinical  
439 scale for the staging of dementia. *Br J Psychiatry* 1982  
440 Jun;140:566-72. doi: 10.1192/bjp.140.6.566.
- 441 15. Folstein MF, Folstein SE, McHugh PR. "Mini-mental state". A practical  
442 method for grading the cognitive state of patients for the clinician. *J*  
443 *Psychiatr Res.* 1975;12:189-98. doi:  
444 10.1016/0022-3956(75)90026-6.
- 445 16. Fujiwara Y, Suzuki H, Yasunaga M, Sugiyama M, Ijuin M, Sakuma N, et  
446 al. Brief screening tool for mild cognitive impairment in older  
447 Japanese: validation of the Japanese version of the Montreal Cognitive  
448 Assessment. *Geriatr Gerontol Int.* 2010;10:225-32. doi:  
449 10.1111/j.1447-0594.2010.00585.x.
- 450 17. Fazekas F, Chawluk JB, Alavi A, Hurtig HI, Zimmerman RA. MR signal  
451 abnormalities at 1.5 T in Alzheimer's dementia and normal aging. *AJR*  
452 *Am J Roentgenol.* 1987;149:351-6. doi: 10.2214/ajr.149.2.351.

- 453 18. Scheltens P, Barkhof F, Leys D, Pruvo JP, Nauta JJ, Vermersch P,  
454 Steinling M, Valk J. A semiquantitative rating scale for the assessment  
455 of signal hyperintensities on magnetic resonance imaging. *J Neurol Sci.*  
456 1993;114:7–12. doi: 10.1016/0022-510x(93)90041-v.
- 457 19. Wardlaw JM, Smith EE, Biessels GJ, Cordonnier C, Fazekas F, Frayne R,  
458 Lindley RI, O'Brien JT, Barkhof F, Benavente OR, et al. Neuroimaging  
459 standards for research into small vessel disease and its contribution to  
460 ageing and neurodegeneration. *Lancet Neurol.* 2013;12:822-38. doi:  
461 10.1016/S1474-4422(13)70124-8.
- 462 20. Kim GH, Kim JE, Choi KG, Lim SM, Lee JM, Na DL, Jeon JH.  
463 T1-weighted axial visual rating scale for an assessment of medial  
464 temporal atrophy in Alzheimer's disease. *J Alzheimers Dis.*  
465 2014;41:169-78. doi: 10.3233/JAD-132333.
- 466 21. Regier DA, Kuhl EA, Kupfer DJ. The DSM-5: Classification and criteria  
467 changes. *World Psychiatry* 2013;12:92-8. doi: 10.1002/wps.20050.
- 468 22. McKhann GM, Knopman DS, Chertkow H, Hyman BT, Jack JrCR, Kawas  
469 CH, Klunk WF, Koroshetz WJ, Manly JJ, Mayeux R, et al. The diagnosis  
470 of dementia due to Alzheimer's disease: recommendations from the

471 National Institute on Aging-Alzheimer's Association workgroups on  
472 diagnostic guidelines for Alzheimer's disease. *Alzheimers Dement*  
473 2011;7:263-9. doi: 10.1016/j.jalz.2011.03.005.

474 23. Gorelick PB, Scuteri A, Black SE, Decarli C, Greenberg SM, Iadecola C,  
475 Launer LJ, Laurent S, Lopez OL, Nyenhuis D, et al. Vascular  
476 contributions to cognitive impairment and dementia: a statement for  
477 healthcare professionals from the american heart  
478 association/american stroke association. *Stroke*. 2011;42:2672-713.  
479 doi: 10.1161/STR.0b013e3182299496.

480 24. Zamboni P, Galeotti R, Menegatti E, Malagoni AM, Tacconi G, Dall'Ara S,  
481 Bartolomei I, Salvi F. Chronic cerebrospinal venous insufficiency in  
482 patients with multiple sclerosis. *J Neurol Neurosurg Psychiatry*.  
483 2009;80:392-9. doi: 10.1136/jnnp.2008.157164.

484 25. Traboulsee AL, Knox KB, Machan L, Zhao Y, Yee I, Rauscher A, Klass D,  
485 Szkup P, Otani R, Kopriva D, et al. Prevalence of extracranial venous  
486 narrowing on catheter venography in people with multiple sclerosis,  
487 their siblings, and unrelated healthy controls: a blinded, case-control  
488 study. *Lancet*. 2014;383(9912):138-45. doi:

- 489       10.1016/S0140-6736(13)61747-X.
- 490   26. Sander D, Winbeck K, Etgen T, Knapp R, Klingelhöfer J, Conrad B.  
491       Disturbance of venous flow patterns in patients with transient global  
492       amnesia.       *Lancet.*       2000;356(9246):1982-4.       doi:  
493       10.1016/S0140-6736(00)03313-4.
- 494   27. Sung SH, Lee CW, Wang PN, Lee HY, Chen CH, Chung CP. Cognitive  
495       functions and jugular venous reflux in severe mitral regurgitation: A  
496       pilot study.       *PLoS One.*       2019;14(2):e0207832.       doi:  
497       10.1371/journal.pone.0207832.
- 498   28. Beggs C, Chung CP, Bergsland N, Wang PN, Shepherd S, Cheng CY,  
499       Dwyer MG, Hu HH, Zivadinov R. Jugular venous reflux and brain  
500       parenchyma volumes in elderly patients with mild cognitive  
501       impairment and Alzheimer's disease. *BMC Neurol.* 2013;13:157. doi:  
502       10.1186/1471-2377-13-157.
- 503   29. Nakamori M, Ebiko Y, Tateyaka K, Ogawa K, Kurose M, Nishino M,  
504       Hirata A, Hayashi Y, Matsushita H, Imamura E, Wakabayashi S.  
505       Usefulness for the evaluation of the jugular venous flow patterns with  
506       ultrasonography. *Neurosonology* 31(3): 125-129, 2018

- 507 30. Akkawi NM, Agosti C, Borroni B, Rozzini L, Magoni M, Vignolo LA,  
508 Padovani A. Jugular valve incompetence: a study using air contrast  
509 ultrasonography on a general population. *J Ultrasound Med.*  
510 2002;21:747-51. doi: 10.7863/jum.2002.21.7.747.
- 511 31. T Tanaka, K Uemura, M Takahashi, S Takehara, T Fukaya, T Tokuyama,  
512 A Satoh, H Ryu. Compression of the left brachiocephalic vein: cause of  
513 high signal intensity of the left sigmoid sinus and internal jugular vein  
514 on MR images. *Radiology* 1993;188:355-61. doi:  
515 10.1148/radiology.188.2.8327678.
- 516 32. Mestre H, Mori Y, Nedergaard M. The Brain's Glymphatic System:  
517 Current Controversies. *Trends Neurosci.* 2020;43:458-466. doi:  
518 10.1016/j.tins.2020.04.003.
- 519

520 **Figure Titles and Legends**

521 **Figure 1. Pattern of internal jugular vein blood flow**

522 (A) Anterograde flow during the entire cardiac cycle without retrograde  
523 flow, (B) Anterograde flow during the entire cardiac cycle with  
524 intermittent retrograde flow, (C) To-and-flow pattern in which  
525 anterograde and retrograde flow appear alternatively during the cardiac  
526 cycle, (D) Retrograde flow during the entire cardiac cycle without  
527 anterograde flow. The former two, mainly anterograde flow, are  
528 designated jugular vein reflux (JVR) (-), while the latter two are  
529 designated JVR (+).

530

531 **Figure 2: (A) Incidence of jugular vein reflux (JVR) by age, (B)**  
532 **Mini-mental State Examination (MMSE) score and (C) Montreal**  
533 **Cognitive Assessment-Japanese (MoCA-J) score in patient groups**  
534 **with versus without JVR**

535

536 **Figure 3: Kaplan-Meier survival analysis of time to dementia**  
537 **diagnosis by baseline jugular vein reflux (JVR) grade**





**Table 1: Baseline characteristics of patients.**

| Characteristics                     | All (n=302) | Jugular Vein Reflex |            | P value |
|-------------------------------------|-------------|---------------------|------------|---------|
|                                     |             | (-) (n=211)         | (+) (n=91) |         |
| Age, years                          | 71.1±10.5   | 66.7±10.4           | 71.8±9.9   | <0.001  |
| Sex, men, %                         | 58.6        | 56.8                | 62.9       | 0.363   |
| Education, years                    | 14.4±2.5    | 14.4 ±2.6           | 14.7±2.4   | 0.285   |
| Hypertension, %                     | 69.4        | 69.5                | 69.4       | 0.946   |
| SBP, mmHg                           | 136.9±18.8  | 135.9±20.8          | 137.9±18.7 | 0.522   |
| DBP, mmHg                           | 75.7±11.9   | 76.3±12.3           | 74.2±10.9  | 0.126   |
| Diabetes mellitus, %                | 26.6        | 25.4                | 29.4       | 0.447   |
| HbA1c, %                            | 6.3±0.9     | 6.2±0.9             | 6.4±1.0    | 0.304   |
| Dyslipidemia, %                     | 56.3        | 55.4                | 57.6       | 0.680   |
| LDL-C, mg/dl                        | 105.2±28.1  | 105.7±27.8          | 106.1±29.0 | 0.730   |
| HDL-C, mg/dl                        | 63.5±20.1   | 63.5±21.3           | 63.5±16.8  | 0.826   |
| TG, mg/dl                           | 115.9±59.1  | 116.0±60.6          | 115.7±55.2 | 0.850   |
| Atrial fibrillation, %              | 9.1         | 8.5                 | 10.7       | 0.751   |
| Chronic kidney disease, %           | 49.8        | 48.3                | 53.5       | 0.419   |
| eGFR                                | 60.7±17.2   | 61.4±17.2           | 59.1±17.3  | 0.461   |
| Cigarette current smoking, %        | 6.7         | 8.1                 | 3.6        | 0.167   |
| Previous cerebrovascular disease, % | 52.9        | 38.9                | 46.5       | 0.187   |
| Previous ischemic heart disease, %  | 13.2        | 10.6                | 19.3       | 0.034   |
| Medication, statin use, %           | 61.0        | 60.1                | 64.0       | 0.538   |
| Anti-platelet use, %                | 61.6        | 62.0                | 60.5       | 0.804   |
| Anti-coagulant use, %               | 11.9        | 11.2                | 14.0       | 0.487   |

| MRI findings                                |         |         |         |       |
|---------------------------------------------|---------|---------|---------|-------|
| Fazekas WMH, median IQR (0-6)               | 2 (2-2) | 2 (2-2) | 2 (2-2) | 0.806 |
| Frontal WMH, median IQR (0-12)              | 4 (2-6) | 4 (1-6) | 4 (2-6) | 0.485 |
| Parietal WMH, median IQR (0-12)             | 2 (0-3) | 2 (0-2) | 2 (0-4) | 0.070 |
| Temporal WMH, median IQR (0-12)             | 0 (0-2) | 0 (0-2) | 0 (0-2) | 0.381 |
| Occipital WMH, median IQR (0-12)            | 0 (0-2) | 0 (0-2) | 1 (0-2) | 0.005 |
| Presence of lacunae, %                      | 45.8    | 43.3    | 51.7    | 0.184 |
| Presence of microbleeds, %                  | 29.2    | 28.0    | 31.9    | 0.535 |
| Temporal lobe atrophy, median IQR(0-6)      | 2 (1-4) | 2(0-4)  | 2 (2-3) | 0.609 |
| Presence of major cerebral artery lesion, % | 12.9    | 14.4    | 9.3     | 0.235 |

Abbreviations: SBP = systolic blood pressure; DBP = diastolic blood pressure; LDL-C = low-density lipoprotein cholesterol; HDL-C = high-density lipoprotein cholesterol; TG = triglyceride; eGFR = an estimated glomerular filtration rate; WMH = white matter hyperintensity.

\*Chronic kidney disease was defined as eGFR of less than 60 ml per minute per 1.73 m<sup>2</sup> of body-surface area.

**Table 2: Cognitive function of patients.**

| Characteristics                  | All (n=302) | Jugular Vein Reflex |            | P value |
|----------------------------------|-------------|---------------------|------------|---------|
|                                  |             | (-) (n=211)         | (+) (n=91) |         |
| MMSE score                       | 28.2±1.8    | 28.3±1.8            | 27.8±1.9   | 0.014   |
| MoCAJ score                      | 24.2±3.3    | 24.8±3.2            | 22.9±3.2   | <0.001  |
| Executive function (median, IQR) | 3 (2-4)     | 3 (2-4)             | 3 (2-3)    | 0.003   |
| Memory (median, IQR)             | 5 (3-7)     | 5 (3-7)             | 4 (2-5)    | 0.001   |
| Orientation (median, IQR)        | 10 (10-10)  | 10 (10-10)          | 10 (10-10) | 0.618   |
| Language (median, IQR)           | 12 (11-12)  | 12 (11-12)          | 12 (11-12) | 0.334   |
| Visuospatial (median, IQR)       | 5 (4-5)     | 5 (4-5)             | 5 (4-5)    | 0.225   |
| Attention (median, IQR)          | 10 (8-11)   | 11 (8-11)           | 10 (8-11)  | 0.077   |

**Table 3. Associations of MMSE and MOCA-J with jugular vein reflux**

|                | MMSE       |            |         | MoCA-J     |            |         |
|----------------|------------|------------|---------|------------|------------|---------|
|                | IJR (-)    | IJR (+)    | ANOVA P | IJR (-)    | IJR (+)    | ANOVA P |
| Observed score | 28.34±0.12 | 27.80±0.19 | 0.014   | 24.76±0.22 | 22.88±0.34 | <0.001  |
| Model 1        | 28.30±0.13 | 27.82±0.19 | 0.043   | 24.65±0.22 | 23.11±0.33 | <0.001  |
| Model 2        | 28.06±0.19 | 27.59±0.23 | 0.057   | 24.01±0.32 | 22.58±0.39 | <0.001  |
| Model 3        | 28.17±0.24 | 27.73±0.29 | 0.107   | 24.40±0.40 | 23.01±0.48 | 0.002   |

Data were shown as mean ±SE

Model 1: Adjusted for age and sex

Model 2: Adjusted for model 1 and education, DM, a history of stroke and ischemic heart disease

Model 3: Adjusted for model 2 and Total WHL score, presence of lacunae, microbleeds and medial temporal atrophy

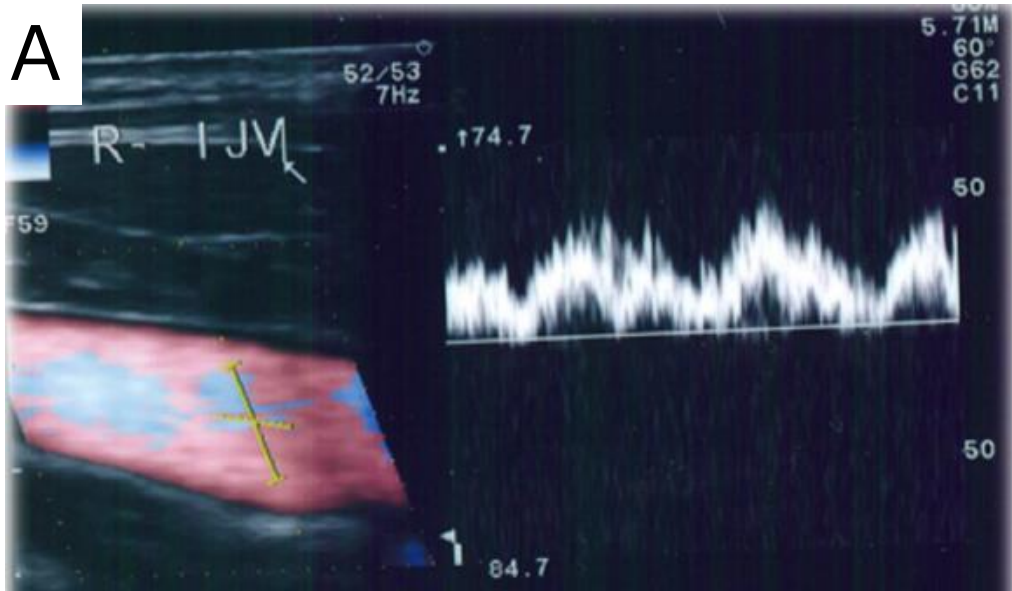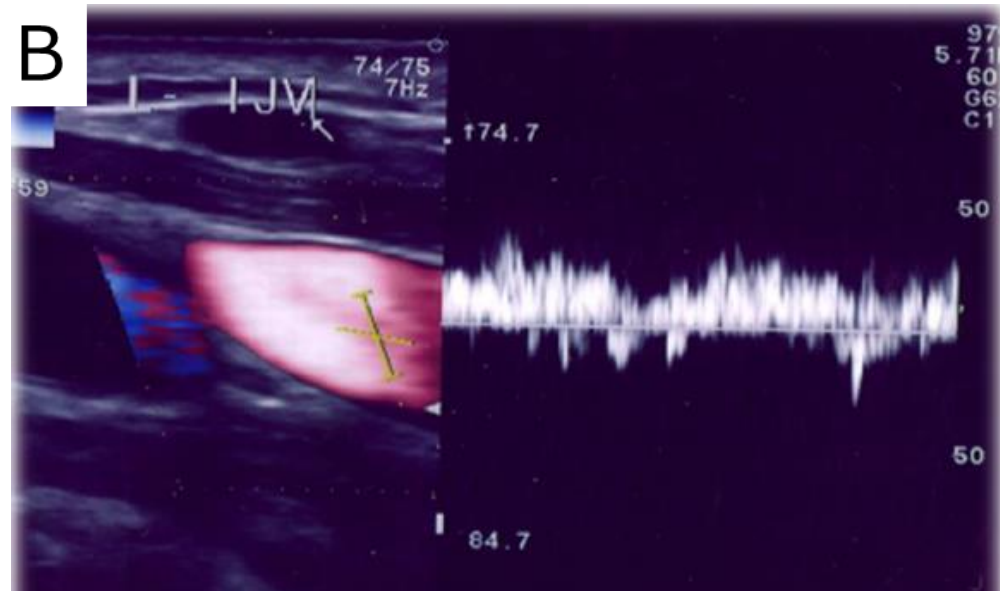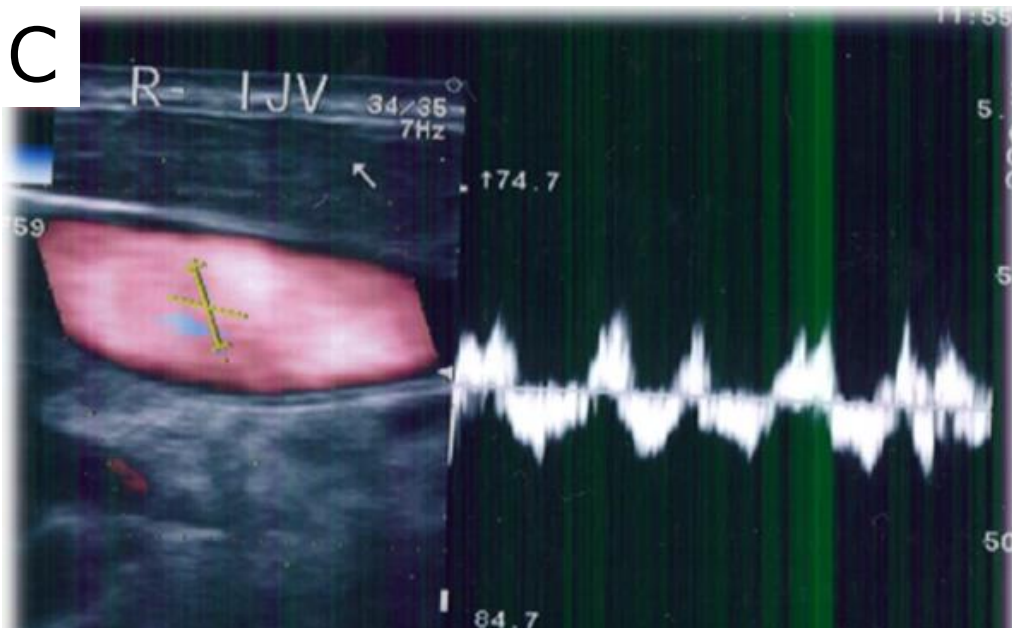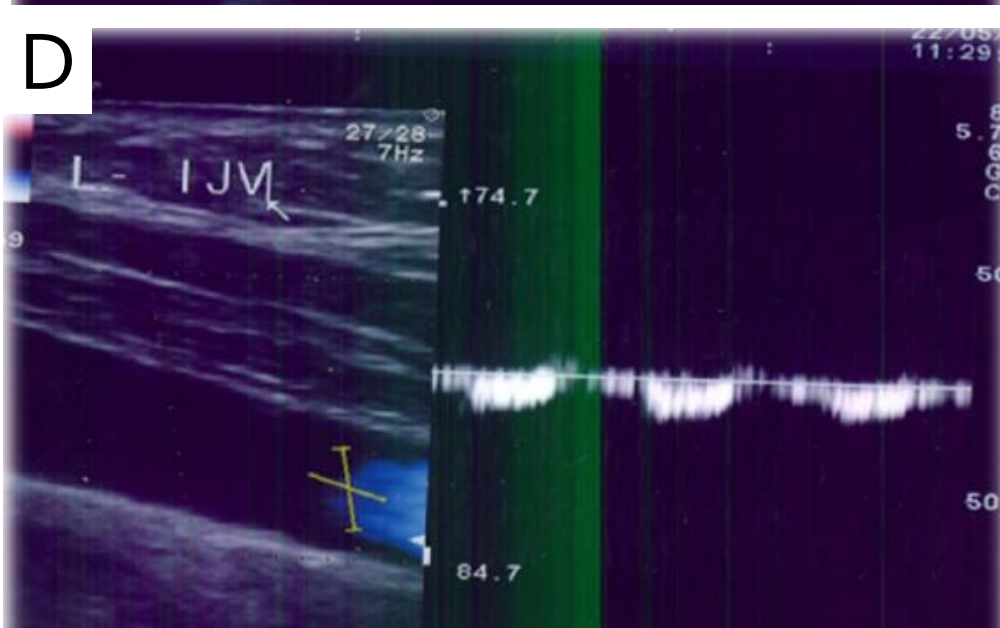

**A**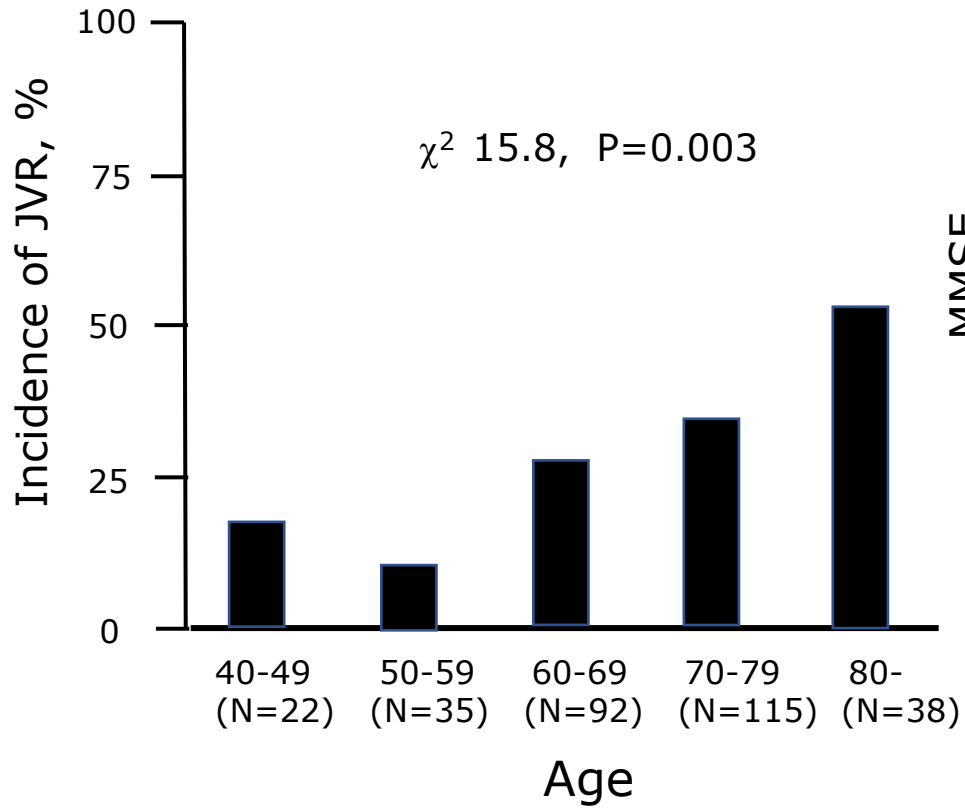**B**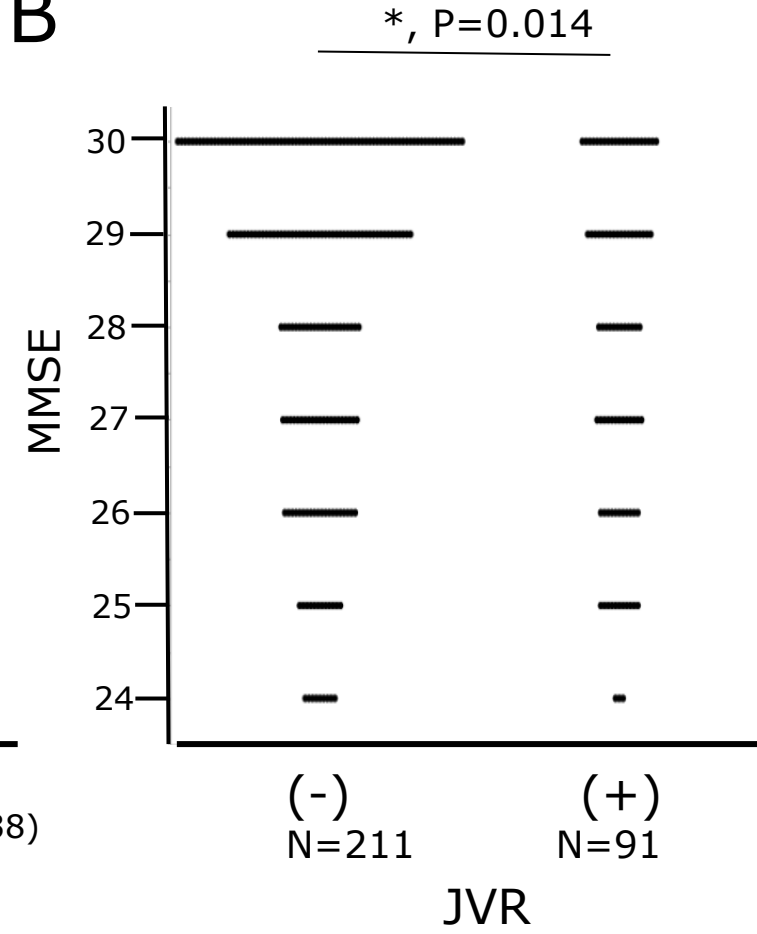**C**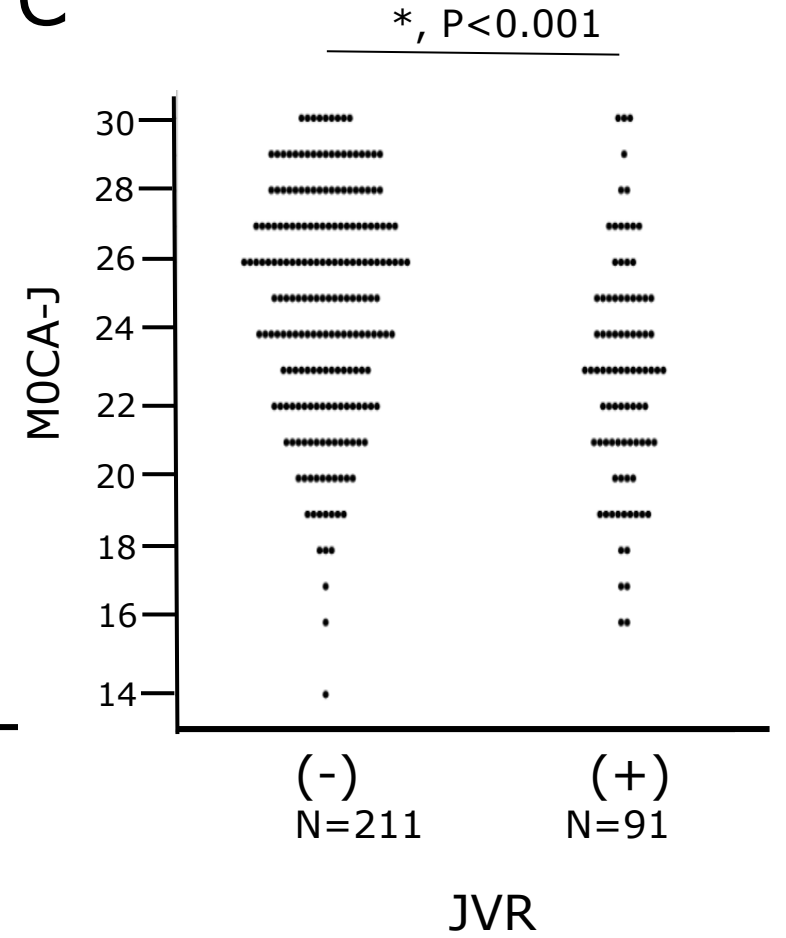

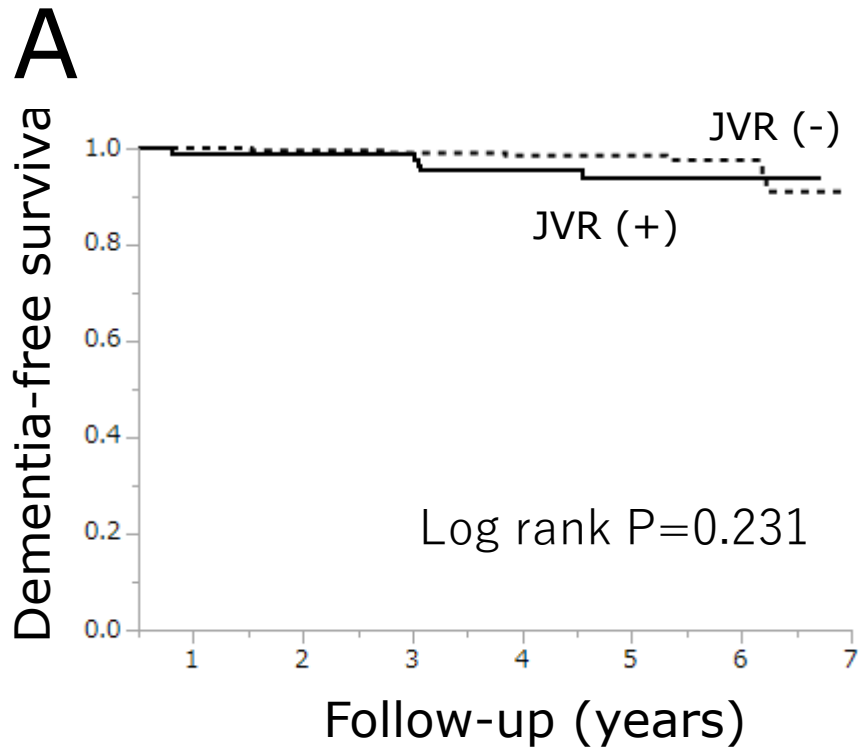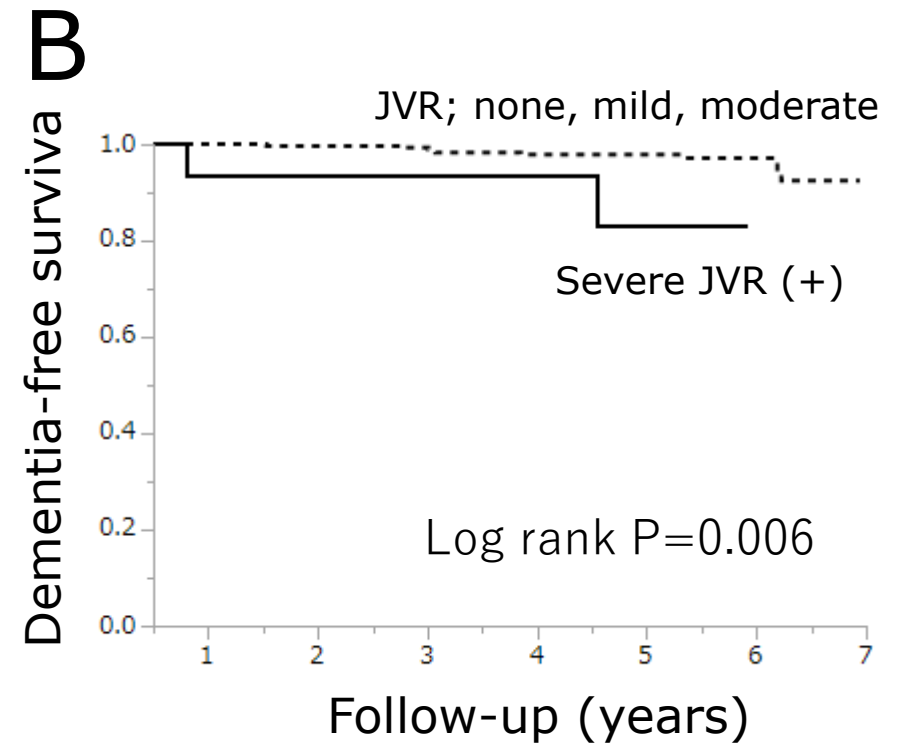

Source: https://www.medrxiv.org/content/10.1101/2023.06.21.23291726v1.full.pdf
